# Supplementary material for: Electrophilic allenes participate in polar Diels–Alder reactions: study of the reactivity and site-, regio- and stereoselectivity from a molecular electron density theory perspective
Source: Royal Society of Chemistry journal article supplement (doi:10.1039/d6ra02126c), 2026-06-01
Supplement: d6ra02126c1.pdf [file d6ra02126c1.pdf]

## Supplementary Material

### Electrophilic Allenes Participating in Polar Diels-Alder reactions. Study of the Reactivity and Site, Regio and Stereo Selectivity from a Molecular Electron Density Theory Perspective

Alicja Bigosińska<sup>a</sup>, Dominika Gondek<sup>a</sup>, Luis R. Domingo<sup>b,\*</sup>, Agnieszka Kacka-Zych<sup>a,\*</sup>

<sup>a</sup>Cracow University of Technology, Faculty of Chemical Engineering and Technology,  
Department of Organic Chemistry and Technology, Warszawska 24, 31-155, Cracow,  
Poland;

agnieszka.kacka-zych@pk.edu.pl

<sup>b</sup>Independent Researcher, Av. Tirso de Molina 20, 46015, Valencia, Spain;  
luisrdomingo@gmail.com

#### Index

- S2** Scheme with the Diels-Alder reaction of simplest allene **3** with Cp **6**.
- S3** Figure with the M06-2x/6-311G(d,p) optimized geometry in toluene of **TS4** involved in the Diels-Alder reaction of the simplest allene **3** with Cp **6**.
- S3** Figure with the ELF basin attractor positions, along with the most relevant valence basin populations of **TS4** associated with the Diels-Alder reaction between the simplest allenes **3** and Cp **6**.
- S4** Table with the electrophilic  $P_k^+$  and nucleophilic  $P_k^-$  and Parr functions of the reagents.
- S5** Table with the M06-2x/6-311G(d,p) electronic energies, enthalpies, entropies S, and Gibbs free energies, computed in toluene at 80 °C, of the stationary points associated with the Diels-Alder reactions of allene **3** and sulphonyl allenes **5** and **17** with the cyclic dienes **6** and **18**.

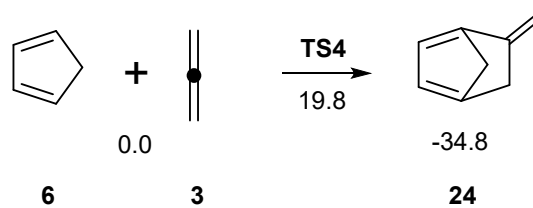

**Scheme S1.** Diels-Alder reaction of simplest allene **3** with Cp **6**. Relative enthalpies in toluene are given in kcal·mol<sup>-1</sup>.

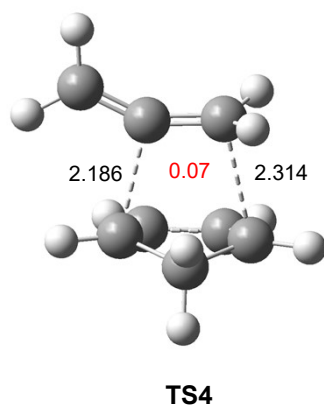

**Figure S1.** M06-2x/6-311G(d,p) Optimized geometry in toluene of **TS4** involved in the Diels-Alder reaction of the simplest allene **3** with Cp **6**. The GEDT value, in red, is given in average number of electrons, e.

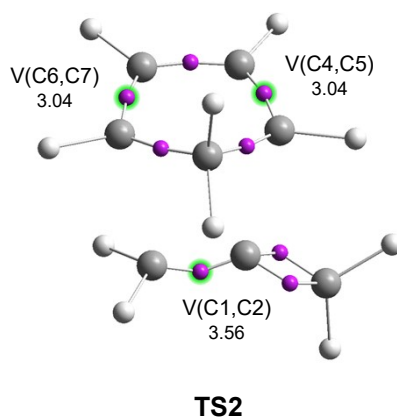

**Figure S2.** ELF basin attractor positions, along with the most relevant valence basin populations of **TS4** associated with the Diels-Alder reaction between the simplest allene **3** and Cp **6**. The electron populations are in average number of electrons e.

**Table S1.** Electrophilic  $P_k^+$  and nucleophilic  $P_k^-$  and Parr functions of the reagents.

|           |                | <b>Electrophilic<br/>Parr function</b> | <b>Nucleophilic<br/>Parr function</b> |
|-----------|----------------|----------------------------------------|---------------------------------------|
|           |                | $P_k^+$                                | $P_k^-$                               |
| <b>5</b>  | C <sub>1</sub> | 0.06                                   | 0.21                                  |
|           | C <sub>2</sub> | 0.31                                   | 0.11                                  |
|           | C <sub>3</sub> | 0.05                                   | 0.18                                  |
| <b>17</b> | C <sub>1</sub> | 0.09                                   | 0.31                                  |
|           | C <sub>2</sub> | 0.60                                   | 0.11                                  |
|           | C <sub>3</sub> | 0.13                                   | 0.23                                  |
| <b>6</b>  | C <sub>4</sub> | -0.09                                  | -0.06                                 |
|           | C <sub>5</sub> | 0.42                                   | 0.50                                  |
|           | C <sub>6</sub> | 0.07                                   | 0.05                                  |
|           | C <sub>7</sub> | 0.07                                   | 0.05                                  |
|           | C <sub>8</sub> | 0.42                                   | 0.50                                  |
| <b>7</b>  | C <sub>4</sub> | -0.08                                  | -0.06                                 |
|           | C <sub>5</sub> | 0.51                                   | 0.25                                  |
|           | C <sub>6</sub> | 0.11                                   | -0.03                                 |
|           | C <sub>7</sub> | 0.06                                   | 0.03                                  |
|           | C <sub>8</sub> | 0.29                                   | 0.74                                  |
| <b>18</b> | C <sub>4</sub> | 0.43                                   | 0.48                                  |
|           | C <sub>5</sub> | 0.03                                   | -0.07                                 |
|           | C <sub>6</sub> | 0.09                                   | 0.32                                  |
|           | C <sub>7</sub> | 0.43                                   | 0.14                                  |

**Table S2.** M06-2x/6-311G(d,p) electronic energies, E in a.u., enthalpies, H in a.u., entropies S in cal·mol<sup>-1</sup>·K<sup>-1</sup>, Gibbs free energies, G in a.u., computed in toluene at 80 °C, of the stationary points associated with the Diels-Alder reactions of allene **3** and sulphonyl allenes **5** and **17** with the cyclic dienes **6** and **18**.

|               | E            | H            | S     | G            |
|---------------|--------------|--------------|-------|--------------|
| <b>17</b>     | -704.491020  | -704.384321  |       | -704.436447  |
| <b>6</b>      | -194.058193  | -193.958299  |       | -193.997655  |
| <b>TS1-n</b>  | -898.533921  | -898.325502  | 10.7  | -898.390227  |
| <b>TS1-x</b>  | -898.532958  | -898.324586  | 11.3  | -898.389757  |
| <b>TS-23</b>  | -898.527337  | -898.319190  | 14.7  | -898.386928  |
| <b>19</b>     | -898.615991  | -898.403066  | -37.9 | -898.465595  |
| <b>20</b>     | -898.619281  | -898.406145  | -39.9 | -898.467488  |
| <b>21</b>     | -898.618328  | -898.405244  | -39.3 | -898.467785  |
| <b>5</b>      | -896.194118  | -896.029454  |       | -896.093142  |
| <b>TS2-n</b>  | -1090.237447 | -1089.971153 | 10.4  | -1090.047533 |
| <b>8</b>      | -1090.320955 | -1090.049974 | -39.0 | -1090.122501 |
| <b>18</b>     | -308.566512  | -308.430107  |       | -308.478340  |
| <b>TS3-pn</b> | -1013.052903 | -1012.807969 | 4.1   | -1012.880831 |
| <b>TS3-mn</b> | -1013.046670 | -1012.801701 | 8.0   | -1012.873051 |
| <b>22</b>     | -1013.133870 | -1012.884143 | -43.7 | -1012.953615 |
| <b>23</b>     | -1013.134119 | -1012.884367 | -43.9 | -1012.952540 |
| <b>3</b>      | -116.62758   | -116.566116  |       | -116.601626  |
| <b>TS-4</b>   | -310.656007  | -310.492846  | 19.8  | -310.542441  |
| <b>24</b>     | -310.747872  | -310.579929  | -34.8 | -310.626674  |
